# Supplementary material for: Tribal ethnicity also identifies particularly vulnerable persons with epilepsy: A cross-sectional study from Central India
Source: Research Square preprint supplement (doi:10.21203/rs.3.rs-8648241/v1), 2026-02-24
Supplement: Supplementary file 1 [file 05db284e9960dbcd0fa8195a.docx]

**Supplementary File

Questionnaire**

| **S. No.** | **Question** | **Response** |
| --- | --- | --- |
| 1 | Camp Location | Nagri |
|  |  | Ambagarh Chowki |
| 2 | Patient's Name |  |
| 3 | Patient's contact number |  |
| 4 | Age |  |
| 5 | Gender | Male |
|  |  | Female |
| 6 | Cultural Identity | Tribal |
|  |  | Non Tribal |
| 7 | Highest Qualification | Class 1 |
|  |  | Class 2 |
|  |  | Class 3 |
|  |  | Class 4 |
|  |  | Class 5 |
|  |  | Class 6 |
|  |  | Class 7 |
|  |  | Class 8 |
|  |  | Class 9 |
|  |  | Class 10 |
|  |  | Class 11 |
|  |  | Class 12 |
|  |  | Graduate |
|  |  | Post graduate |
|  |  | Never attended school |
| 8 | Employment Status | Employed |
|  |  | Unemployed |
|  |  | Retired |
|  |  | Housewife |
|  |  | Student |
|  |  | Other |
| 9 | Monthly income (employed)/Family income |  |
| 10 | Ayushman Card | YES |
|  |  | NO |
|  |  | Applied For |
| 11 | Marital Status | Married |
|  |  | Unmarried |
|  |  | Other |
| 12 | Age at onset |  |
| 13 | Current seizure frequency? | Daily |
|  |  | Weekly |
|  |  | Monthly |
|  |  | Yearly |
|  |  | <1/Year |
|  |  | Not well Defined |
| 14 | Treatment Status | On Treatment |
|  |  | Untreated |
| 15 | If yes specify drug and dose (Check all that apply) | Sodium valproate 200 OD |
|  |  | Sodium valproate 200 BD |
|  |  | Sodium valproate 500 OD |
|  |  | Sodium valproate 500 BD |
|  |  | Carbamazepine 100 OD |
|  |  | Carbamazepine 100 BD |
|  |  | Carbamazepine 200 OD |
|  |  | Carbamazepine 200 BD |
|  |  | Carbamazepine 300 OD |
|  |  | Carbamazepine 300 BD |
|  |  | Levetiracetam 250 OD |
|  |  | Levetiracetam 250 BD |
|  |  | Levetiracetam 500 OD |
|  |  | Levetiracetam 500 BD |
|  |  | Phenytoin 100 OD |
|  |  | Phenytoin 100 BD |
|  |  | Phenytoin 100 TDS |
|  |  | Oxcarbazepine 150 OD |
|  |  | Oxcarbazepine 150 BD |
|  |  | Oxcarbazepine 300 OD |
|  |  | Oxcarbazepine 300 BD |
|  |  | Clobazam 5 OD |
|  |  | Clobazam 5 BD |
|  |  | Clobazam 10 OD |
|  |  | Clobazam 10 BD |
|  |  | Clobazam 20 OD |
|  |  | Phenobarbital 30 OD |
|  |  | Phenobarbital 30 BD |
|  |  | Phenobarbital 60 OD |
|  |  | Phenobarbital 60 BD |
|  |  | Syp. Sodium Valproate 200 OD |
|  |  | Syp. Sodium Valproate 200 BD |
|  |  | Syp. Levetiracetam 250 OD |
|  |  | Syp. Levetiracetam 500 BD |
|  |  | Other |
